# Supplementary material for: Response of the phytoplankton community to water quality in a local alpine glacial lake of Xinjiang Tianchi, China: potential drivers and management implications
Source: Royal Society of Chemistry journal article supplement (doi:10.1039/c7em00180k), 2017-01-01
Supplement: c7em00180k1.pdf [file c7em00180k1.pdf]

Electronic Supplementary Material (ESI) for Environmental Science:  
Processes & Impacts.

This journal is © The Royal Society of Chemistry 2017

## **Supplementary Data**

### **Response of phytoplankton community to water quality in local alpine glacial lake of Xinjiang Tianchi, China: potential drivers and management implications**

Xiaotian Lu <sup>a,b</sup>, Shuai Song <sup>a</sup>, Yonglong Lu <sup>a,b\*</sup>, Tieyu Wang<sup>a,b</sup>, Zhaoyang Liu <sup>a,b</sup>,

Qifeng Li <sup>a,b</sup>, Meng Zhang <sup>a,b</sup>, Sarvajayakesavalu Suriyanarayanan<sup>c,d</sup>, Alan Jenkins<sup>e</sup>

*<sup>a</sup> State Key Laboratory of Urban and Regional Ecology, Research Center for Eco-  
Environmental Sciences, Chinese Academy of Sciences, Beijing 100085, China*

*<sup>b</sup> University of Chinese Academy of Sciences, Beijing 100049, China*

*<sup>c</sup> SCOPE (Scientific Committee on Problems of the Environment) Beijing Office,  
Beijing 100085, China*

*<sup>d</sup> Department of Water and Health, Faculty of Life Sciences, JSS University, Mysore  
570015, India*

*<sup>e</sup> Centre for Ecology and Hydrology, Maclean Building, Crowmarsh Gifford  
Wallingford, Oxon, OX10 8BB, UK*

\*Corresponding author: Tel: 86-10-62915537; Fax: 86-10-62918177;

[yllu@rcees.ac.cn](mailto:yllu@rcees.ac.cn) (Y. L. Lu)

## Tables

Table S1 List of phytoplankton genus

Table S2 Codes of phytoplankton species for CCA

Table S3 Pearson Correlations of water quality parameters between Chl-a and environmental variables

Table S4 Parameters used for calculation of hotel and catering discharge

## Figures

Fig. S1 Variation of water temperature, pH, DO and Secchi-depth (SD) in surface water samples

Fig. S2 Photos of filamentous algae bloom in Tianchi and Western Tianchi in 2014

Table S1 List of phytoplankton genus

| Category             | Genus                                                                                                                                                                                                                                                                                                                                                                                                                                                                                                                                                                                                                                                                                                                                                                                                                            |
|----------------------|----------------------------------------------------------------------------------------------------------------------------------------------------------------------------------------------------------------------------------------------------------------------------------------------------------------------------------------------------------------------------------------------------------------------------------------------------------------------------------------------------------------------------------------------------------------------------------------------------------------------------------------------------------------------------------------------------------------------------------------------------------------------------------------------------------------------------------|
| Bacillariophyta (32) | <i>Melosira varians</i> , <i>Melosira arena</i> , <i>Cyclotella</i> sp., <i>Synedra acus</i> , <i>Synedra</i> sp., <i>Fragilaria</i> sp., <i>Asterionella</i> sp., <i>Diatoma vulgare</i> , <i>Diatoma vulgare</i> var. <i>product</i> , <i>Diatoma hiemale</i> , <i>Diatoma arcus</i> , <i>Eunotia lunaris</i> , <i>Navicula</i> sp., <i>Cymbella</i> sp., <i>Gomphonema</i> sp., <i>Achnanthes</i> sp., <i>Gyrosigma</i> sp., <i>Cocconeis placentula</i> , <i>Nitzschia</i> sp., <i>Gomphonema constrictum</i> , <i>Amphora ovalis</i> , <i>Neidium</i> sp., <i>Synedra amphicephala</i> , <i>Surirella</i> sp., <i>Campyladiscus</i> sp., <i>Cocconeis pediculus</i> , <i>Cymbella parva</i> , <i>Pinnularia</i> sp., <i>Cymbella cistula</i> , <i>Coscinodiscales</i> sp., <i>Nitzschia longissimi</i> , <i>Diatoma</i> sp. |
| Chlorophyta (13)     | <i>Spirogyra</i> sp., <i>Ulothrix</i> sp., <i>Oedogonium</i> sp., <i>Closterium</i> sp., <i>Mougeotia</i> sp., <i>Chladophora</i> sp., <i>Chlamydomonas</i> sp., <i>Selenastrum</i> sp., <i>Scenedesmus quadricauda</i> , <i>Scenedesmus bicaudatus</i> , <i>Scenedesmus bijuga</i> , <i>Scenedesmus</i> sp., <i>Tetraedron minimum</i>                                                                                                                                                                                                                                                                                                                                                                                                                                                                                          |
| Cyanophyta (5)       | <i>Oscillatoria</i> sp., <i>Merismopedia</i> sp., <i>Leptolyngbya</i> sp., <i>Nostoc</i> sp., <i>Anabaena</i> sp.                                                                                                                                                                                                                                                                                                                                                                                                                                                                                                                                                                                                                                                                                                                |
| Dinoflagellate (3)   | <i>Gymnogonium</i> sp., <i>Peridinium</i> sp., <i>Ceratium</i> sp.                                                                                                                                                                                                                                                                                                                                                                                                                                                                                                                                                                                                                                                                                                                                                               |
| Cryptophyta (3)      | <i>Cryptomonas ovata</i> , <i>Cryptomonas</i> sp., <i>Chroomonas acuta</i>                                                                                                                                                                                                                                                                                                                                                                                                                                                                                                                                                                                                                                                                                                                                                       |
| Chrysophyceae (1)    | <i>Dinobryon</i> sp.                                                                                                                                                                                                                                                                                                                                                                                                                                                                                                                                                                                                                                                                                                                                                                                                             |

Table S2 Codes of phytoplankton species for CCA

| Codes | Category        | Phytoplankton                 |
|-------|-----------------|-------------------------------|
| A1    | Bacillariophyta | <i>Cyclotella sp.</i>         |
| A2    | Bacillariophyta | <i>Synedra acus</i>           |
| A3    | Bacillariophyta | <i>Asterionella sp.</i>       |
| A4    | Bacillariophyta | <i>Cymbella sp.</i>           |
| A5    | Bacillariophyta | <i>Gomphonema sp.</i>         |
| A6    | Bacillariophyta | <i>Nitzschia sp.</i>          |
| A7    | Bacillariophyta | <i>Navicula sp.</i>           |
| A8    | Bacillariophyta | <i>Synedra sp.</i>            |
| A9    | Bacillariophyta | <i>Fragilaria sp.</i>         |
| B1    | Chlorophyta     | <i>Tetraedron minimum</i>     |
| B2    | Chlorophyta     | <i>Chlamydomonas sp.</i>      |
| B3    | Chlorophyta     | <i>Selenastrum sp.</i>        |
| B4    | Chlorophyta     | <i>Scenedesmus bicaudatus</i> |
| C1    | Dinoflagellate  | <i>Gymnogonium sp.</i>        |
| C2    | Dinoflagellate  | <i>Peridinium sp.</i>         |
| C3    | Dinoflagellate  | <i>Ceratium sp.</i>           |
| D1    | Cryptophyta     | <i>Cryptomonas ovata</i>      |
| D2    | Cryptophyta     | <i>Cryptomonas sp.</i>        |
| D3    | Cryptophyta     | <i>Chroomonas acuta</i>       |
| E1    | Chrysophyceae   | <i>Dinobryon sp.</i>          |

Table S3. Pearson Correlations of water quality parameters between Chl-*a* and environmental variables

|                      | Chl- <i>a</i> | Water<br>temperature | TN             | TP | COD <sub>Mn</sub> | Ammonium      | Nitrate        | DO | pH            | SD             | SRP           |
|----------------------|---------------|----------------------|----------------|----|-------------------|---------------|----------------|----|---------------|----------------|---------------|
| Chl- <i>a</i>        | 1             | <b>.362**</b>        | –              | –  | <b>.302**</b>     | <b>.536**</b> | <b>-.261**</b> | –  | <b>.398**</b> | -.222*         | –             |
| Water<br>temperature |               | 1                    | <b>-.311**</b> | –  | <b>.515**</b>     | –             | <b>-.417**</b> | –  | –             | <b>-.282**</b> | –             |
| TN                   |               |                      | 1              | –  | –                 | –             | <b>.381**</b>  | –  | -.244*        | .241*          | –             |
| TP                   |               |                      |                | 1  | –                 | <b>.386**</b> | –              | –  | -.230*        | –              | <b>.773**</b> |
| COD <sub>Mn</sub>    |               |                      |                |    | 1                 | –             | –              | –  | .201*         | <b>-.273**</b> | –             |
| Ammonium             |               |                      |                |    |                   | 1             | <b>-.348**</b> | –  | –             | <b>-.290**</b> | –             |
| Nitrate              |               |                      |                |    |                   |               | 1              | –  | –             | <b>.570**</b>  | –             |
| DO                   |               |                      |                |    |                   |               |                | 1  | .201*         | –              | –             |
| pH                   |               |                      |                |    |                   |               |                |    | 1             | –              | –             |
| SD                   |               |                      |                |    |                   |               |                |    |               | 1              | –             |
| SRP                  |               |                      |                |    |                   |               |                |    |               |                | 1             |

Data were log transformed before analysis. (\* for  $P < 0.05$ , \*\*  $P < 0.01$ , – not significant,  $n = 102$ )

Table S4 Parameters used for calculation of hotel and catering discharge

|                         | Discharge coefficients | TN            | TP            | Ammonia-N     |
|-------------------------|------------------------|---------------|---------------|---------------|
|                         | Large ( $\geq 200$ )   | 6.60 g/bed/d  | 0.66 g/bed/d  | 4.80 g/bed/d  |
| Tourism hotels          | Medium (50-200)        | 6.0 g/bed/d   | 0.59 g/bed/d  | 4.30 g/bed/d  |
|                         | Small ( $\leq 50$ )    | 4.90 g/bed/d  | 0.49 g/bed/d  | 3.50 g/bed/d  |
|                         | Large ( $\geq 500$ )   | 3.18 g/seat/d | 0.29 g/seat/d | 1.46 g/seat/d |
| Catering (regular food) | Medium (100-500)       | 3.70 g/seat/d | 0.35 g/seat/d | 1.67 g/seat/d |
|                         | Small ( $\leq 100$ )   | 4.24 g/seat/d | 0.49 g/seat/d | 1.86 g/seat/d |

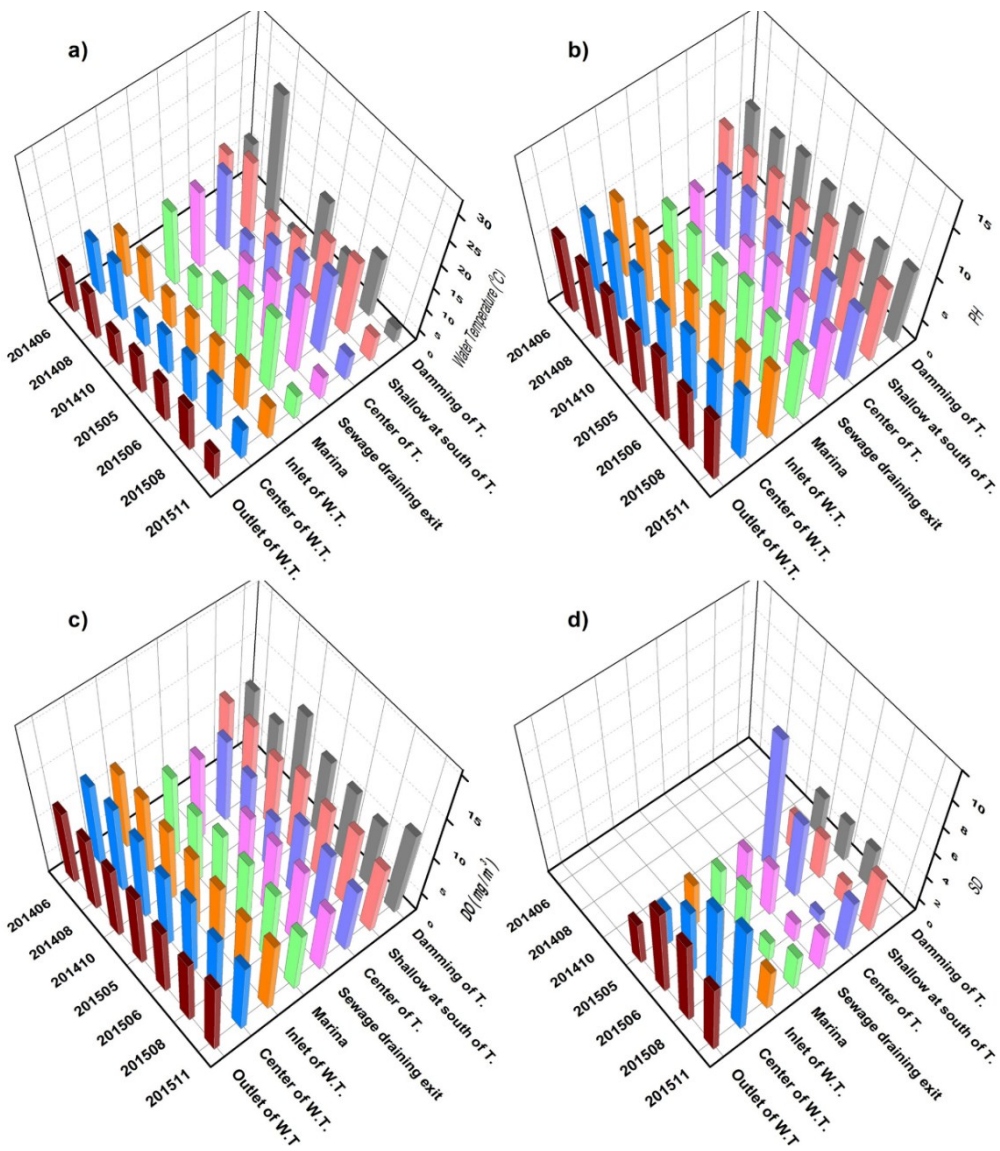

Fig. S1. Variation of water temperature, pH, DO and Secchi-depth (SD) in surface water samples

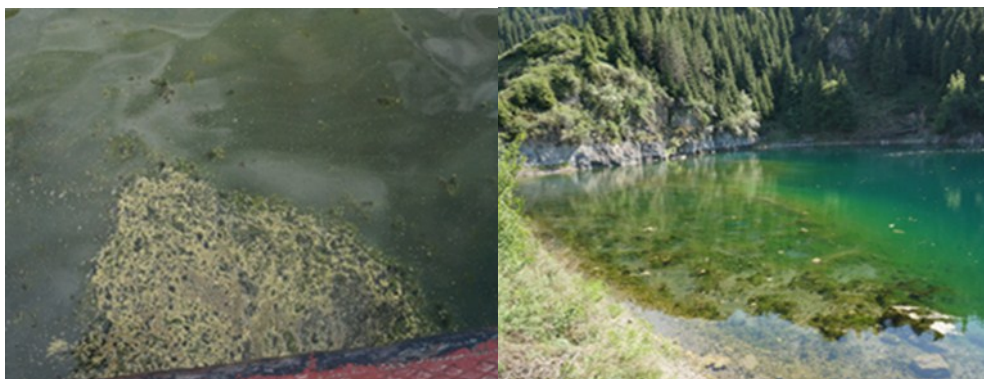

Fig. S2 Photos of filamentous algae bloom in Tianchi and Western Tianchi in 2014
